# Supplementary material for: Anti-GARP Antibodies Inhibit Release of TGF-β by Regulatory T Cells via Different Modes of Action, but Do Not Influence Their Function In Vitro
Source: PubMed Central journal article supplement (PMC10563435; doi:10.4049/immunohorizons.2200072), 2023-03-16
Supplement: IH_2200072_Supplemental_1.pdf [file IH_2200072_Supplemental_1.pdf]

## Supplementary Figure 1

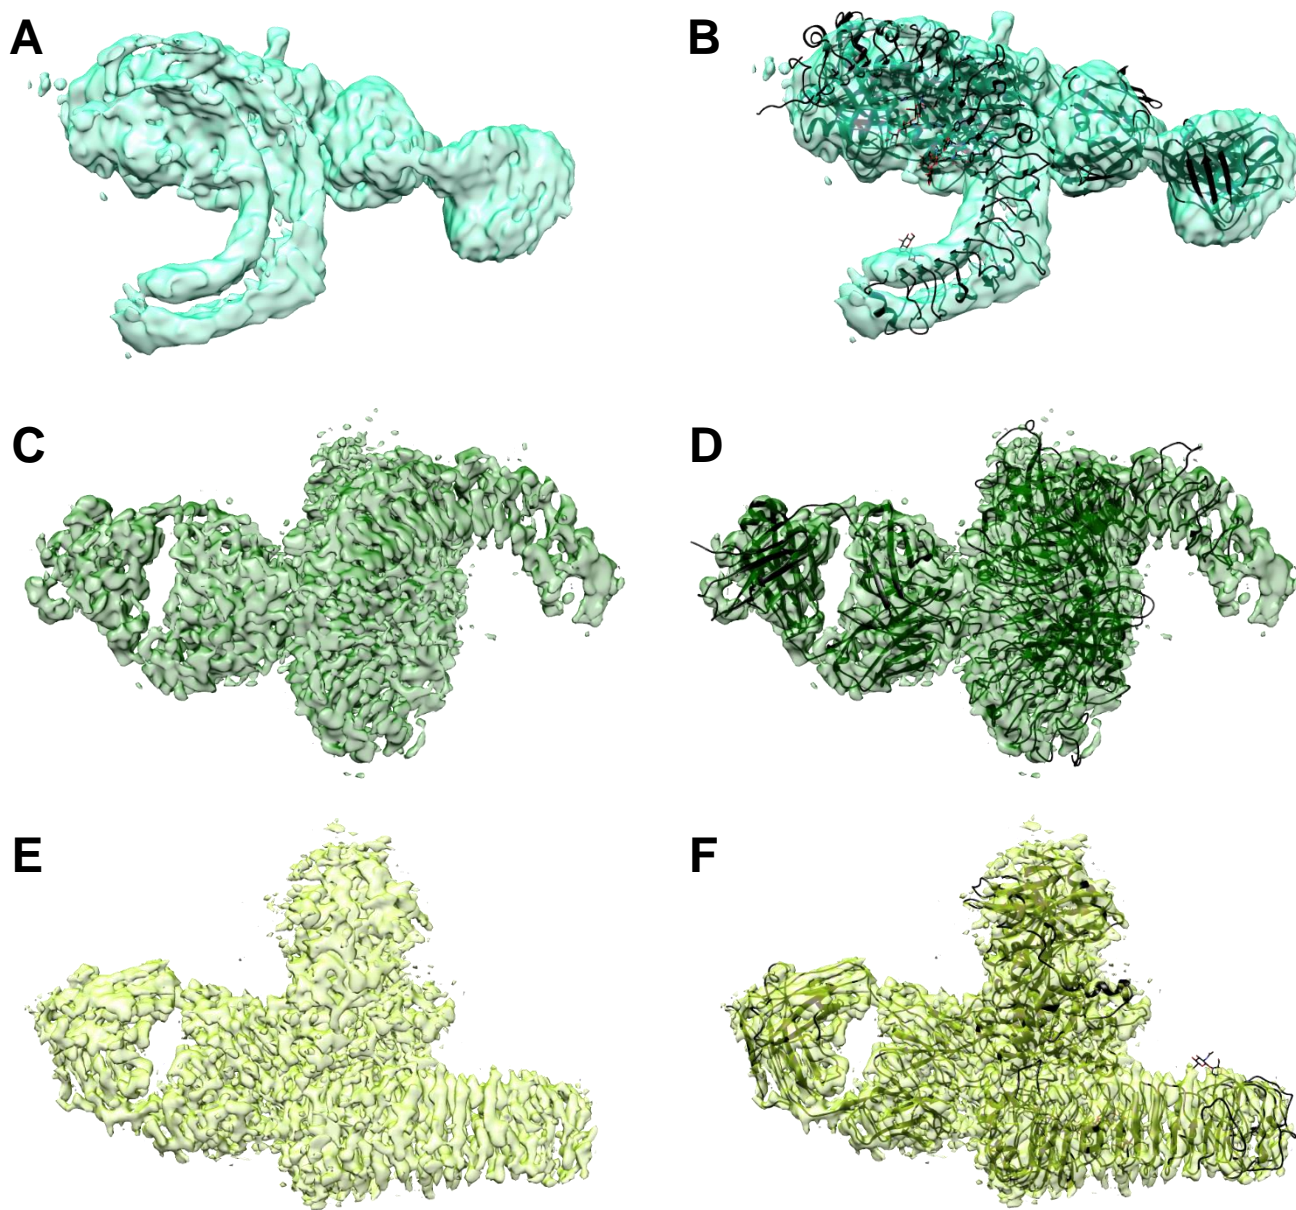

**Cryo-EM maps and fitted models.** Cryo-EM maps (**A, C, E**) and models (cartoon representation) fitted in the corresponding maps (**B, D, F**) of the GARP/L-TGF- $\beta$  in complex with **A, B** Fab 28G11 (cyan) at 7.5 Å resolution, **C, D** LHG-10 (lemon green) at 2.7 Å resolution, and **E, F** 12G2B4 (dark green) at 3.4 Å resolution. All Fabs offer good model to map correlation considering the corresponding resolution.

## Supplementary Figure 2

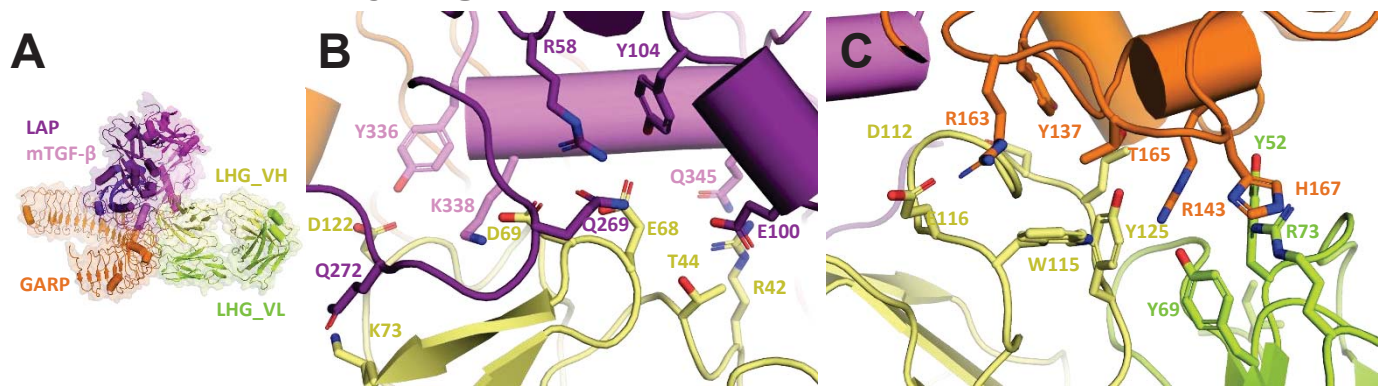

**Detailed representation of the GARP/L-TGF- $\beta$ -LHG-10 epitope and paratope.** **A** Schematic overview scheme of the GARP/L-TGF- $\beta$ -LHG-10 complex. **B** The binding epitope of LHG-10 (yellow and lemon green) on LAP (dark purple) consists of residues 269-273, 58, 100, 104 and residues 336-338, 345 on mTGF- $\beta$  (light purple). **C** GARP (orange) residues 137, 140-143, 161-163, 165 and 167 interact with the light (lemon green) and heavy (yellow) chain of the variable regions of Fab LHG-10.

### Supplementary Figure 3

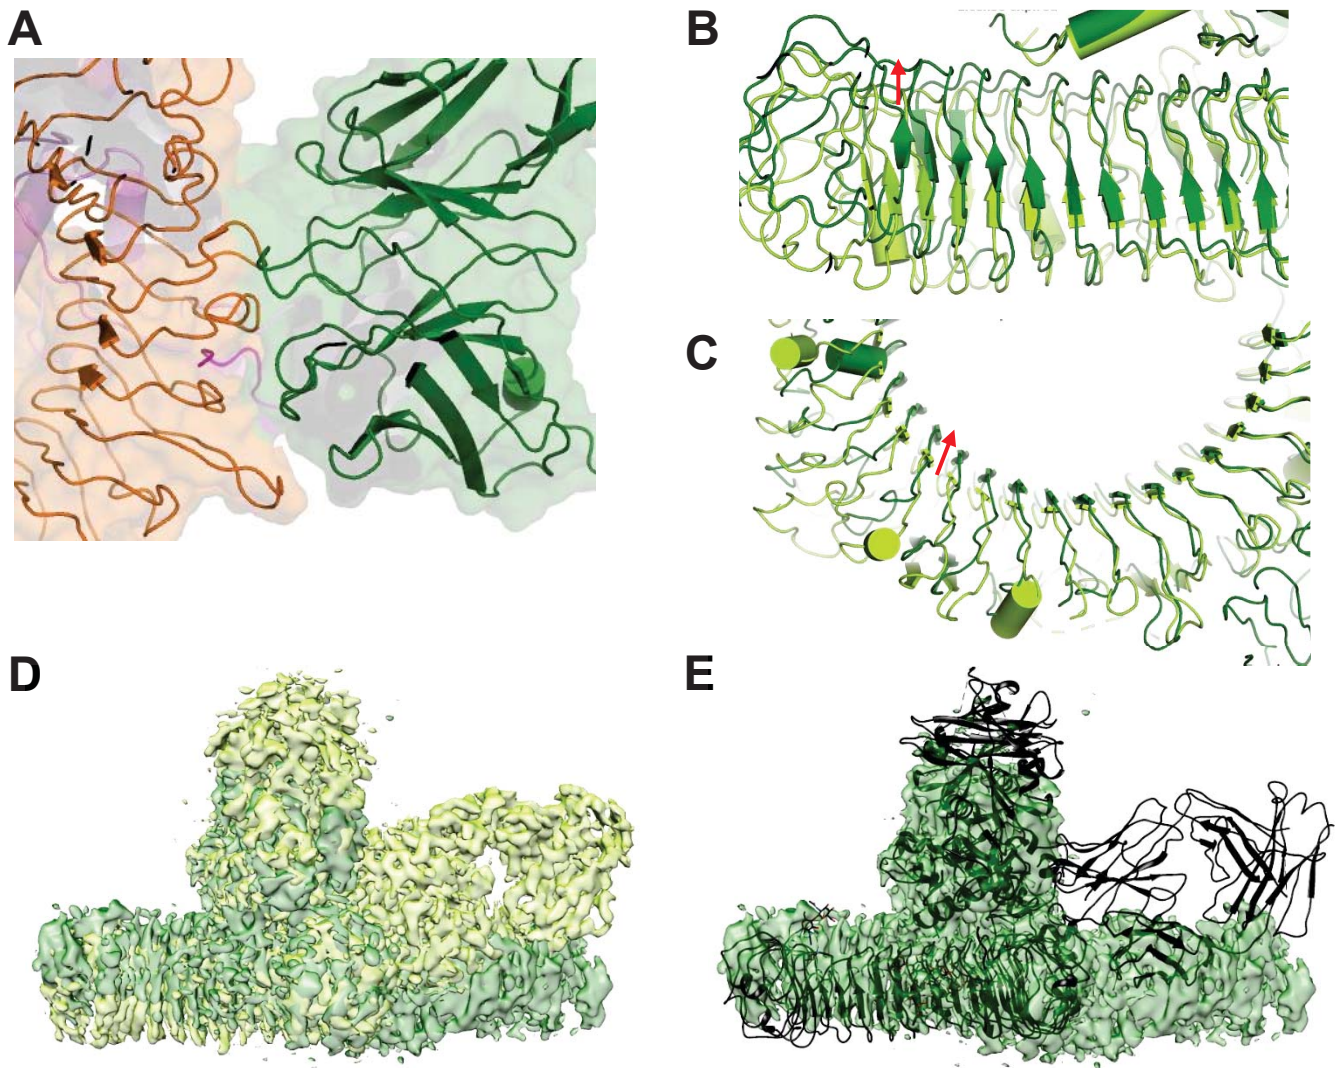

**Conformational rearrangements upon binding of Fab 12G2B4.** **A** 12G2B4 (dark green) binds exactly at the point where the horseshoe fold of GARP (orange) is completed by a  $\beta$ -strand addition of LAP (magenta). Here, the  $\beta$ -sheet at the N-terminus of LAP intercalates into the  $\beta$ -sandwich of GARP. **B** Upon binding of 12G2B4 a conformational rearrangement of GARP is induced. In comparison to the LHG-10 bound structure (lemon green), the C-terminal portion of 12G2B4 bound GARP (dark green) moves up towards L-TGF- $\beta$  and **C** In addition, the curvature of the horseshoe folds increases in this region, resulting in a slight dislocation compared to the LHG structure. **D** These conformational changes are also clearly visible in the EM density of the structure, as shown by the superposition of the maps of LHG-10 (lemon green) and 12G2B4 (dark green). **E** Overlay of 12G2B4 cryo-EM map and LHG-10 model (black), aligned on GARP N-terminal portion and L-TGF- $\beta$ .

**Supplemental Table 1: Data collection, processing and refinement statistics for GARP-L-TGF- $\beta$  cryo-EM structures in complex with different Fabs.**

| <b>Experimental data</b>              |                       |                       |                       |
|---------------------------------------|-----------------------|-----------------------|-----------------------|
| Protein                               | GARP - L-TGF- $\beta$ | GARP - L-TGF- $\beta$ | GARP - L-TGF- $\beta$ |
| Fab                                   | LHG-10                | 28G11                 | 12G2B4                |
| PDB /EMBD ID                          | EMD-16460<br>8C7H     | EMD-16456             | EMD-16459             |
| <b>Data Collection and Processing</b> |                       |                       |                       |
| Microscope                            | FEI Titan Krios       | FEI Titan Krios       | FEI Titan Krios       |
| Voltage (kV)                          | 300                   | 300                   | 300                   |
| Camera                                | Gatan K2 Summit       | Gatan K3              | Gatan K3              |
| Exposure time (s)                     | 8                     | 8                     | 8                     |
| Total Dose (e-/Å <sup>2</sup> )       | 40                    | 40                    | 40                    |
| Defocus range (μm)                    | 0.8-2.8               | 0.8-2.8               | 0.8-2.8               |
| Pixel size (Å) (calibrated)           | 1.08                  | 0.83                  | 0.83                  |
| Symmetry imposed                      | C1                    | C1                    | C1                    |
| Number of micrographs                 | 2842                  | 3354                  | 8289                  |
| Initial particle number               | 2,837,425             | 3,639,216             | 2,602,167             |
| Final particle number                 | 418,886               | 488,857               | 613,675               |
| Map resolution (Å)                    | 2.7                   | 4.3                   | 3.4                   |
| FSC threshold                         | 0.143                 | 0.143                 | 0.143                 |
| <b>Refinement</b>                     |                       |                       |                       |
| Model composition                     |                       |                       |                       |
| Protein (residues)                    | 9172                  |                       |                       |
| Ligands                               | BMA:3; NAG:6          |                       |                       |
| RMSD bond length (Å)                  | 0.003                 |                       |                       |
| RMSD bond angles (°)                  | 0.661                 |                       |                       |
| Rotamer outliers (%)                  | 0.42                  |                       |                       |
| ADP (B-factor) (min/max/mean)         |                       |                       |                       |
| Protein                               | 3.37/159.21/68.62     |                       |                       |
| Ligand                                | 16.10/94.14/53.72     |                       |                       |
| Ramachandran plot                     |                       |                       |                       |
| Favoured (%)                          | 95.61                 |                       |                       |
| Allowed (%)                           | 4.39                  |                       |                       |
| Outliers (%)                          | 0.00                  |                       |                       |
| All-atom clashscore                   | 8.20                  |                       |                       |
| MolProbity score                      | 1.75                  |                       |                       |
